# Supplementary material for: Identification of the BcLEA Gene Family and Functional Analysis of the BcLEA73 Gene in Wucai (Brassica campestris L.)
Source: MDPI journal article supplement (doi:10.3390/genes14020415), 2023-02-05
Supplement: s1 [file s1]

**Table S1.** Identification and analysis of the physicochemical properties of the *BrLEA* gene family members.

| Gene Name      | Gene ID            | Chr | Family   | aa Len | GRAVY  | Mw/Da    | pI    | Subcellular location | Intron number |
|----------------|--------------------|-----|----------|--------|--------|----------|-------|----------------------|---------------|
| <i>BrLEA1</i>  | <i>Bra011874.1</i> | A01 | Dehydrin | 149    | -0.863 | 15928.4  | 5.65  | Cytoplasm            | 1             |
| <i>BrLEA2</i>  | <i>Bra033520.1</i> | A01 | LEA_3    | 99     | -0.4   | 10582.01 | 9.72  | Nucleus              | 1             |
| <i>BrLEA3</i>  | <i>Bra031399.1</i> | A01 | LEA_2    | 150    | -0.663 | 17469.06 | 9.61  | Chloroplast          | 0             |
| <i>BrLEA4</i>  | <i>Bra021311.1</i> | A01 | LEA_2    | 223    | -0.399 | 25914    | 10.04 | Chloroplast          | 0             |
| <i>BrLEA5</i>  | <i>Bra038671.1</i> | A01 | LEA_2    | 211    | 0.108  | 23726.39 | 9.68  | Cell membrane        | 0             |
| <i>BrLEA6</i>  | <i>Bra038669.1</i> | A01 | LEA_2    | 234    | 0.033  | 26508.87 | 8.99  | Nucleus              | 0             |
| <i>BrLEA7</i>  | <i>Bra028562.1</i> | A02 | LEA_2    | 209    | 0.113  | 23613.3  | 9.26  | Cell membrane        | 0             |
| <i>BrLEA8</i>  | <i>Bra020222.1</i> | A02 | LEA_2    | 132    | -0.434 | 15043.08 | 9.3   | Chloroplast          | 0             |
| <i>BrLEA9</i>  | <i>Bra022642.1</i> | A02 | SMP      | 173    | -0.357 | 18379.46 | 5.88  | Nucleus              | 1             |
| <i>BrLEA10</i> | <i>Bra039737.1</i> | A02 | LEA_2    | 248    | -0.212 | 27627.95 | 9.47  | Nucleus              | 1             |
| <i>BrLEA11</i> | <i>Bra008242.1</i> | A02 | Dehydrin | 194    | -1.352 | 21840.38 | 5.52  | Nucleus              | 1             |
| <i>BrLEA12</i> | <i>Bra020604.1</i> | A02 | SMP      | 181    | -0.481 | 18366.26 | 4.76  | Nucleus              | 2             |
| <i>BrLEA13</i> | <i>Bra031809.1</i> | A02 | Dehydrin | 192    | -1.021 | 18844.17 | 7.14  | Cytoplasm            | 2             |
| <i>BrLEA14</i> | <i>Bra005891.1</i> | A03 | LEA_2    | 235    | -0.105 | 26245.37 | 9.41  | Chloroplast          | 1             |
| <i>BrLEA15</i> | <i>Bra005911.1</i> | A03 | LEA_1    | 159    | -0.818 | 16180.83 | 8.93  | Nucleus              | 1             |
| <i>BrLEA16</i> | <i>Bra029085.1</i> | A03 | SMP      | 177    | -0.351 | 18691.81 | 5.43  | Nucleus              | 1             |
| <i>BrLEA17</i> | <i>Bra022950.1</i> | A03 | LEA_6    | 71     | -1.238 | 7581.23  | 6.03  | Nucleus              | 0             |
| <i>BrLEA18</i> | <i>Bra000173.1</i> | A03 | LEA_5    | 88     | -1.659 | 9630.38  | 5.88  | Nucleus              | 1             |
| <i>BrLEA19</i> | <i>Bra000339.1</i> | A03 | LEA_2    | 777    | -0.135 | 84314.53 | 9.02  | Chloroplast          | 10            |
| <i>BrLEA20</i> | <i>Bra000414.1</i> | A03 | LEA_2    | 166    | 0.03   | 17823.38 | 4.81  | Chloroplast          | 1             |
| <i>BrLEA21</i> | <i>Bra000519.1</i> | A03 | LEA_2    | 228    | -0.35  | 25831.24 | 9.45  | Cell membrane        | 0             |
| <i>BrLEA22</i> | <i>Bra000526.1</i> | A03 | LEA_2    | 256    | -0.05  | 28462.98 | 9.41  | Chloroplast          | 0             |
| <i>BrLEA23</i> | <i>Bra000884.1</i> | A03 | LEA_3    | 94     | -0.349 | 10095.53 | 9.85  | Chloroplast          | 1             |
| <i>BrLEA24</i> | <i>Bra001869.1</i> | A03 | SMP      | 239    | -0.38  | 25385.45 | 5.7   | Nucleus              | 1             |
| <i>BrLEA25</i> | <i>Bra012801.1</i> | A03 | LEA_2    | 208    | 0.152  | 23027.83 | 9.86  | Cell membrane        | 0             |
| <i>BrLEA26</i> | <i>Bra014864.1</i> | A04 | LEA_3    | 122    | -0.598 | 14152.16 | 9.2   | Chloroplast          | 1             |
| <i>BrLEA27</i> | <i>Bra033428.1</i> | A04 | LEA_2    | 208    | 0.144  | 23136.02 | 9.89  | Chloroplast          | 0             |
| <i>BrLEA28</i> | <i>Bra028103.1</i> | A04 | LEA_2    | 255    | -0.2   | 28751.42 | 9.86  | Chloroplast          | 1             |
| <i>BrLEA29</i> | <i>Bra034321.1</i> | A04 | LEA_2    | 260    | -0.179 | 28595.09 | 9.86  | Chloroplast          | 0             |
| <i>BrLEA30</i> | <i>Bra034341.1</i> | A04 | LEA_2    | 238    | -0.262 | 26639.28 | 9.49  | Cell membrane        | 0             |
| <i>BrLEA31</i> | <i>Bra021869.1</i> | A04 | LEA_6    | 72     | -1.174 | 7627.3   | 5.21  | Nucleus              | 0             |
| <i>BrLEA32</i> | <i>Bra017276.1</i> | A04 | LEA_2    | 208    | 0.064  | 23279.91 | 9.51  | Chloroplast          | 0             |
| <i>BrLEA33</i> | <i>Bra017272.1</i> | A04 | LEA_2    | 227    | -0.062 | 25700.98 | 9.88  | Cell membrane        | 0             |

|         |             |     |          |     |        |          |       |               |   |
|---------|-------------|-----|----------|-----|--------|----------|-------|---------------|---|
| BrLEA34 | Bra017229.1 | A04 | LEA_4    | 398 | -1.065 | 43386.25 | 6.02  | Cell wall     | 2 |
| BrLEA35 | Bra016868.1 | A04 | LEA_4    | 679 | -1.088 | 72972.61 | 5.98  | Cell wall     | 1 |
| BrLEA36 | Bra037669.1 | A04 | LEA_2    | 506 | -0.399 | 55465.06 | 8.85  | Chloroplast   | 3 |
| BrLEA37 | Bra039288.1 | A04 | LEA_2    | 166 | 0.013  | 18119.88 | 4.5   | Chloroplast   | 1 |
| BrLEA38 | Bra004564.1 | A05 | LEA_2    | 220 | 0.047  | 24269.55 | 9.98  | Chloroplast   | 0 |
| BrLEA39 | Bra004565.1 | A05 | LEA_2    | 166 | 0.093  | 17725.34 | 4.81  | Chloroplast   | 1 |
| BrLEA40 | Bra004981.1 | A05 | LEA_5    | 84  | -1.704 | 9264.98  | 6.74  | Nucleus       | 1 |
| BrLEA41 | Bra005256.1 | A05 | LEA_4    | 399 | -0.97  | 43565.34 | 5.74  | Cell wall     | 3 |
| BrLEA42 | Bra005340.1 | A05 | LEA_2    | 233 | -0.082 | 26086.31 | 9.45  | Chloroplast   | 0 |
| BrLEA43 | Bra005353.1 | A05 | LEA_1    | 98  | -1.115 | 10666.89 | 9.22  | Nucleus       | 0 |
| BrLEA44 | Bra018556.1 | A05 | LEA_3    | 93  | -0.482 | 10112.56 | 9.99  | Chloroplast   | 1 |
| BrLEA45 | Bra039956.1 | A05 | SMP      | 262 | -0.239 | 26692.5  | 4.71  | Nucleus       | 2 |
| BrLEA46 | Bra034822.1 | A05 | LEA_2    | 212 | 0.021  | 23866.49 | 9.65  | Chloroplast   | 0 |
| BrLEA47 | Bra018649.1 | A06 | LEA_2    | 207 | -0.153 | 23555.65 | 10.29 | Chloroplast   | 0 |
| BrLEA48 | Bra019628.1 | A06 | LEA_4    | 451 | -1.141 | 48554.47 | 5.2   | Cell wall     | 2 |
| BrLEA49 | Bra025819.1 | A06 | Dehydrin | 271 | -1.508 | 31018.16 | 5     | Nucleus       | 1 |
| BrLEA50 | Bra019437.1 | A06 | LEA_2    | 183 | 0.148  | 20019.22 | 6.65  | Nucleus       | 0 |
| BrLEA51 | Bra009983.1 | A06 | SMP      | 192 | -0.515 | 19473.41 | 4.76  | Nucleus       | 2 |
| BrLEA52 | Bra025130.1 | A06 | LEA_4    | 201 | -0.429 | 22054.03 | 5.4   | Nucleus       | 1 |
| BrLEA53 | Bra024907.1 | A06 | LEA_2    | 228 | 0.116  | 24568.58 | 9.18  | Chloroplast   | 1 |
| BrLEA54 | Bra039616.1 | A07 | LEA_4    | 480 | -0.921 | 52652.67 | 6.47  | Nucleus       | 1 |
| BrLEA55 | Bra012230.1 | A07 | Dehydrin | 220 | -1.399 | 24837.39 | 5.11  | Nucleus       | 1 |
| BrLEA56 | Bra003175.1 | A07 | LEA_2    | 200 | 0.151  | 32517.04 | 10.24 | Nucleus       | 2 |
| BrLEA57 | Bra003732.1 | A07 | Dehydrin | 194 | -1.308 | 21755.35 | 5.47  | Nucleus       | 1 |
| BrLEA58 | Bra015779.1 | A07 | Dehydrin | 195 | -1.455 | 22044.52 | 5.45  | Nucleus       | 1 |
| BrLEA59 | Bra014346.1 | A08 | LEA_2    | 264 | -0.057 | 28400.74 | 9.45  | Cell membrane | 1 |
| BrLEA60 | Bra013992.1 | A08 | Dehydrin | 257 | -1.645 | 28978    | 6.17  | Nucleus       | 1 |
| BrLEA61 | Bra038061.1 | A08 | LEA_3    | 57  | -0.912 | 6614.4   | 4.94  | Nucleus       | 0 |
| BrLEA62 | Bra035491.1 | A08 | LEA_1    | 132 | -1.109 | 14933.95 | 9.68  | Nucleus       | 1 |
| BrLEA63 | Bra010561.1 | A08 | LEA_4    | 487 | -0.923 | 52431.94 | 5.63  | Cell wall     | 2 |
| BrLEA64 | Bra030494.1 | A08 | LEA_2    | 151 | 0.075  | 16404.92 | 4.72  | Chloroplast   | 1 |
| BrLEA65 | Bra036272.1 | A09 | LEA_3    | 94  | -0.299 | 10088.55 | 9.99  | Chloroplast   | 1 |
| BrLEA66 | Bra036112.1 | A09 | SMP      | 191 | -0.414 | 19600.77 | 4.99  | Nucleus       | 2 |
| BrLEA67 | Bra037177.1 | A09 | Dehydrin | 144 | -1.36  | 15139.46 | 8.81  | Cytoplasm     | 2 |
| BrLEA68 | Bra027969.1 | A09 | LEA_2    | 269 | -0.217 | 30181.66 | 10.24 | Chloroplast   | 0 |
| BrLEA69 | Bra029567.1 | A09 | LEA_2    | 231 | -0.158 | 26511.59 | 10.45 | Mitochondrion | 0 |
| BrLEA70 | Bra023278.1 | A09 | LEA_1    | 133 | -0.878 | 14507.53 | 9.24  | Nucleus       | 1 |
| BrLEA71 | Bra036843.1 | A09 | Dehydrin | 134 | -0.887 | 13834.22 | 9.19  | Cytoplasm     | 1 |
| BrLEA72 | Bra006927.1 | A09 | LEA_2    | 208 | 0.139  | 23087.91 | 9.93  | Cell wall     | 0 |
| BrLEA73 | Bra039946.1 | A09 | LEA_6    | 82  | -1.055 | 8433.11  | 4.72  | Nucleus       | 0 |
| BrLEA74 | Bra031192.1 | A09 | Dehydrin | 183 | -1.016 | 19183.88 | 6.49  | Cytoplasm     | 1 |
| BrLEA75 | Bra031615.1 | A09 | LEA_2    | 207 | -0.103 | 23424.42 | 10.13 | Chloroplast   | 1 |

|                |                    |      |       |     |        |          |      |             |   |
|----------------|--------------------|------|-------|-----|--------|----------|------|-------------|---|
| <i>BrLEA76</i> | <i>Bra033377.1</i> | A10  | SMP   | 283 | -0.543 | 32586.25 | 8.89 | Chloroplast | 7 |
| <i>BrLEA77</i> | <i>Bra033375.1</i> | A10  | SMP   | 177 | -0.54  | 18185.98 | 4.53 | Nucleus     | 1 |
| <i>BrLEA78</i> | <i>Bra033350.1</i> | A10  | LEA_3 | 98  | -0.229 | 10298.59 | 8.03 | Chloroplast | 1 |
| <i>BrLEA79</i> | <i>Bra009184.1</i> | A10  | LEA_2 | 237 | -0.17  | 26493.54 | 9.27 | Chloroplast | 0 |
| <i>BrLEA80</i> | <i>Bra009225.1</i> | A10  | LEA_1 | 159 | -0.789 | 16286.99 | 9.22 | Nucleus     | 1 |
|                |                    | Scaf |       |     |        |          |      |             |   |
| <i>BrLEA81</i> | <i>Bra035001.1</i> | fold | LEA_2 | 206 | 0.056  | 23148.61 | 7.09 | Chloroplast | 1 |
|                |                    | 000  |       |     |        |          |      |             |   |
|                |                    | 100  |       |     |        |          |      |             |   |
|                |                    | Scaf |       |     |        |          |      |             |   |
| <i>BrLEA82</i> | <i>Bra040894.1</i> | fold | LEA_5 | 172 | -1.635 | 18997.7  | 6.17 | Nucleus     | 1 |
|                |                    | 000  |       |     |        |          |      |             |   |
|                |                    | 300  |       |     |        |          |      |             |   |
